# Supplementary material for: Pterostilbene enhances reproductive outcomes and oocyte quality in aged mice without adverse effects
Source: publisher site journal article supplement (doi:10.18632/aging.206287), 2025-07-23
Supplement: Supplementary file [file aging-v17-206287-supplementary-material-SD1.pdf]

## SUPPLEMENTARY FIGURES

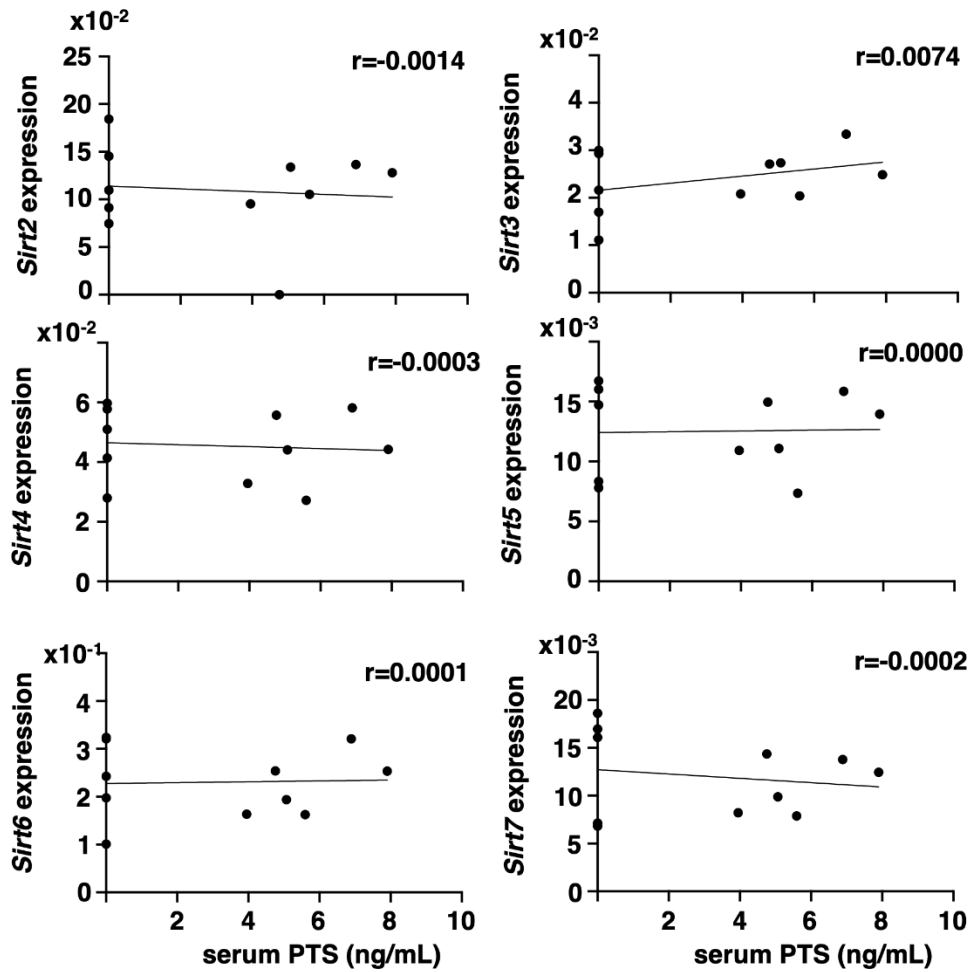

**Supplementary Figure 1. Correlation between serum pterostilbene levels and ovarian transcript levels of the Sirtuin family in aged mice.** Serum pterostilbene (PTS) levels were quantified in control and 22-week ingestion groups using HPLC-MS/MS, whereas Sirt1 transcript levels were determined by real-time RT-PCR. The primers used are shown in Table 1. No correlation was observed between serum PTS levels and ovarian mRNA expression levels of the Sirtuin family genes (n=11 animals). A correlation coefficient (r) above 0.3 was considered to indicate a significant correlation.

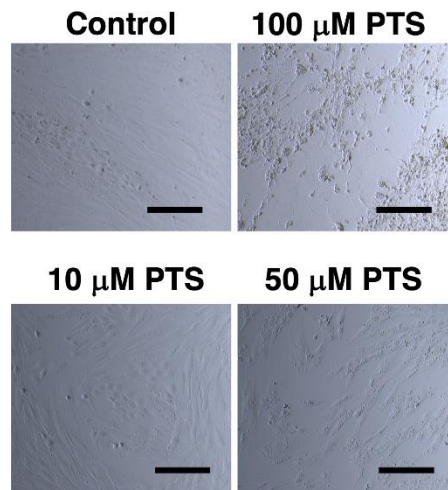

**Supplementary Figure 2. Impact of high dose pterostilbene on cell viability in human endometrial stromal cell line (THESC).** The THESC cells were cultured with or without a high dose (100 mM) of pterostilbene (PTS). The non-treated group served as a control. Treatment with 100 mM PTS overnight results in cell death. Scale bars: 50 mm.

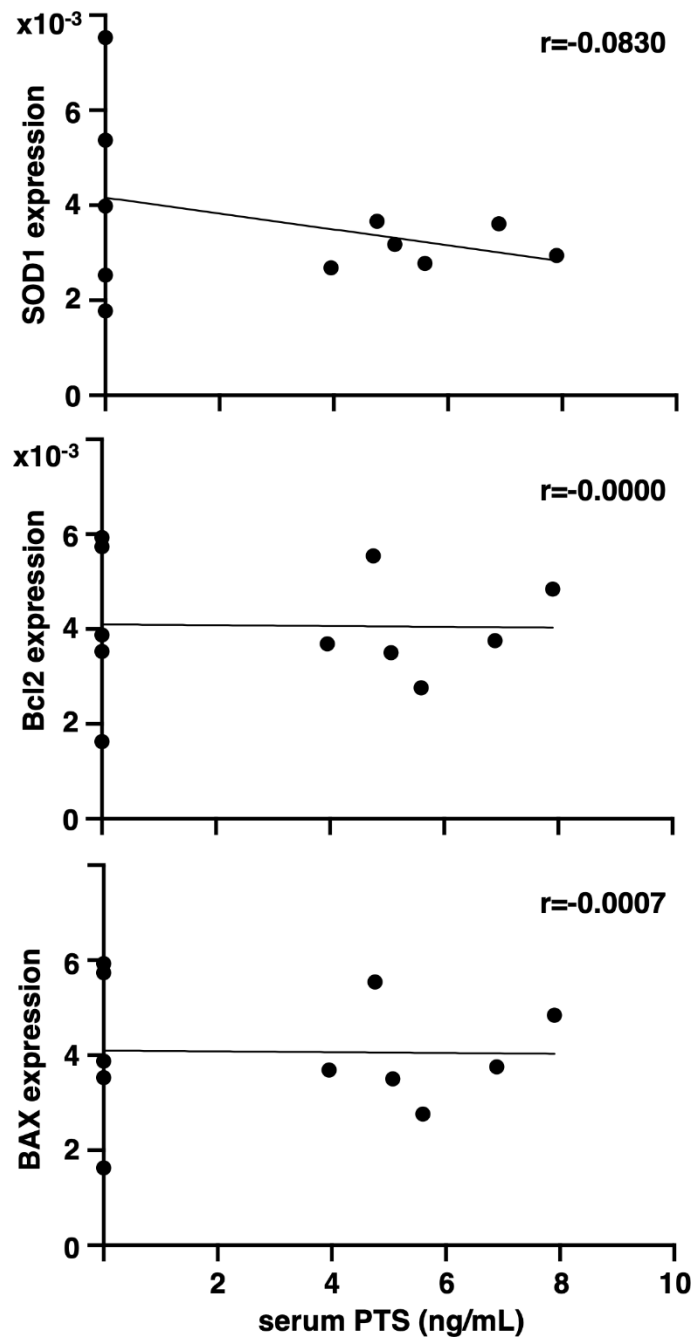

**Supplementary Figure 3. Correlation between serum pterostilbene levels and ovarian transcript levels of *Sod1*, *Bcl2*, and *Bax* in aged mice.** Serum pterostilbene (PTS) levels were quantified in control and 22-week ingestion groups using HPLC-MS/MS, while *Sod1*, *Bcl2*, and *Bax* transcript levels were determined by real-time RT-PCR. The primers used are shown in Table 1. No correlation was observed between serum PTS levels and ovarian mRNA expression levels of *Sod1*, *Bcl2*, and *Bax* genes (n=11 animals). A correlation coefficient (r) above 0.3 was considered to indicate a significant correlation.
